# Supplementary material for: Molecular Prevalence, Genetic Diversity, and Tissue Tropism of Bartonella Species in Small Mammals from Yunnan Province, China
Source: Preprints.org preprint supplement (doi:10.20944/preprints202404.0026.v1), 2024-04-01
Supplement: Supplementary file 1 [file supplementary]

**Table S2 Identity comparisons of nucleotide and amino acid sequence of *Bartonella rpoB* gene (866bp) in small mammals in this study**

|       | HQ25 | HQ45 | HQ65 | HQ9  | HQ38 | GS164 | GS109 | GS9  | GS8  | GS2  | 1    | 2    | 3    | 4    | 5    | 6     | 7    | 8    | 9    |
|-------|------|------|------|------|------|-------|-------|------|------|------|------|------|------|------|------|-------|------|------|------|
| HQ25  |      | 90.6 | 89.9 | 99.9 | 86.7 | 97.6  | 91.9  | 99.3 | 88.6 | 91.9 | 96.9 | 89.2 | 84.8 | 87.2 | 82.2 | 100.0 | 97.1 | 85.9 | 89.6 |
| HQ45  | 66.3 |      | 99.8 | 90.0 | 86.6 | 91.1  | 90.9  | 90.4 | 96.2 | 90.7 | 87.4 | 88.2 | 84.9 | 91.9 | 86.5 | 94.9  | 90.2 | 96.0 | 98.3 |
| HQ65  | 64.7 | 96.7 |      | 89.9 | 86.4 | 91.1  | 90.5  | 90.0 | 95.9 | 90.7 | 87.4 | 88.2 | 84.9 | 91.9 | 86.5 | 95.5  | 90.2 | 86.0 | 98.3 |
| HQ9   | 85.1 | 68.6 | 69.5 |      | 86.3 | 97.7  | 91.8  | 99.4 | 88.0 | 92.0 | 97.0 | 89.4 | 84.9 | 87.3 | 82.2 | 99.9  | 97.2 | 86.0 | 89.6 |
| HQ38  | 57.1 | 60.9 | 61.4 | 62.6 |      | 86.9  | 87.0  | 87.1 | 86.2 | 86.9 | 85.4 | 86.9 | 96.4 | 84.2 | 93.7 | 86.7  | 87.7 | 97.6 | 86.6 |
| GS164 | 79.3 | 70.2 | 71.2 | 89.9 | 62.8 |       | 92.0  | 97.6 | 89.2 | 92.1 | 95.9 | 90.5 | 96.4 | 89.1 | 84.1 | 97.6  | 98.3 | 86.8 | 90.4 |
| GS109 | 72.0 | 74.6 | 72.0 | 74.3 | 63.6 | 74.3  |       | 92.1 | 89.7 | 98.1 | 89.2 | 95.8 | 85.0 | 87.8 | 82.8 | 91.9  | 90.8 | 85.7 | 90.4 |
| GS9   | 88.8 | 72.6 | 70.0 | 92.6 | 63.9 | 87.3  | 79.6  |      | 88.3 | 91.9 | 96.9 | 89.2 | 85.4 | 87.0 | 81.9 | 99.3  | 97.0 | 86.4 | 89.3 |
| GS8   | 62.3 | 89.6 | 87.7 | 64.6 | 60.2 | 66.6  | 72.2  | 67.9 |      | 89.5 | 85.6 | 87.1 | 84.3 | 91.0 | 85.6 | 92.0  | 88.1 | 85.5 | 97.5 |
| GS2   | 65.7 | 68.9 | 69.8 | 76.7 | 63.2 | 76.1  | 88.3  | 71.9 | 66.6 |      | 89.6 | 96.9 | 85.1 | 88.0 | 83.1 | 91.9  | 91.3 | 85.9 | 90.5 |
| 1     | 81.5 | 65.2 | 66.1 | 95.1 | 62.9 | 89.0  | 70.9  | 89.3 | 61.9 | 75.6 |      | 91.9 | 85.5 | 87.2 | 84.4 | 96.9  | 97.0 | 96.1 | 88.4 |
| 2     | 63.8 | 67.2 | 68.1 | 74.6 | 63.3 | 75.2  | 87.3  | 69.9 | 65.2 | 95.3 | 77.4 |      | 85.6 | 88.0 | 85.5 | 89.2  | 91.3 | 86.0 | 89.3 |
| 3     | 53.8 | 58.5 | 59.3 | 63.3 | 87.9 | 64.9  | 59.5  | 60.5 | 57.9 | 63.2 | 64.3 | 63.9 |      | 85.4 | 81.0 | 85.4  | 87.1 | 99.7 | 86.5 |
| 4     | 57.1 | 73.9 | 74.9 | 66.8 | 57.4 | 68.8  | 63.9  | 61.9 | 73.2 | 68.2 | 66.4 | 68.2 | 60.7 |      | 94.6 | 92.0  | 88.8 | 85.2 | 93.3 |
| 5     | 53.2 | 68.9 | 69.8 | 61.8 | 55.9 | 64.5  | 59.9  | 57.9 | 68.2 | 64.5 | 63.1 | 65.7 | 57.0 | 93.9 |      | 89.0  | 88.8 | 85.2 | 87.9 |
| 6     | 99.1 | 66.1 | 64.6 | 84.9 | 57.0 | 79.1  | 71.8  | 88.5 | 62.1 | 65.5 | 81.2 | 63.6 | 53.6 | 57.0 | 53.0 |       | 97.1 | 85.9 | 97.1 |
| 7     | 70.8 | 62.5 | 63.4 | 82.7 | 61.5 | 85.5  | 64.6  | 77.3 | 58.9 | 69.5 | 84.3 | 70.8 | 61.4 | 63.9 | 67.6 | 70.6  |      | 87.2 | 90.0 |
| 8     | 49.2 | 53.5 | 54.2 | 57.6 | 82.5 | 59.6  | 53.5  | 55.2 | 53.2 | 57.0 | 59.5 | 58.4 | 90.6 | 55.2 | 58.4 | 49.1  | 67.7 |      | 86.7 |
| 9     | 81.7 | 92.3 | 93.2 | 95.0 | 88.5 | 95.7  | 88.6  | 89.6 | 89.6 | 95.3 | 95.7 | 95.3 | 93.5 | 99.3 | 93.8 | 69.8  | 89.5 | 86.2 |      |

**1: AB529478.1 *Bartonella Koshimizu*; 2: AB529485.1 *Bartonella sp* ;3: LC513659.1 *Bartonella rochalimae* ; 4: AF165992.1 *Bartonella elizabethae* ; 5: MF105889.1 *Bartonella elizabethae* ; 6:AB426694.1 *Bartonella grahamii* ; 7:AY515132.1 *Bartonella phoceensis* ; 8:CP019785.1 *Bartonella sp*; 9:AB426697.1 *Bartonella grahamii***
