# Supplementary material for: Molecular Prevalence, Genetic Diversity, and Tissue Tropism of Bartonella Species in Small Mammals from Yunnan Province, China
Source: Preprints.org preprint supplement (doi:10.20944/preprints202404.0026.v1), 2024-04-01
Supplement: Supplementary file 2 [file supplementary]

**Table S3 Identity comparisons of nucleotide and amino acid sequence of *Bartonella gltA* gene (375bp) in small mammals in this study**

|       | GS129 | GS134 | GS136 | HQ64 | HQ19 | 1    | 2    | 3    | 4    | 5     | 5    |
|-------|-------|-------|-------|------|------|------|------|------|------|-------|------|
| GS129 |       | 71.0  | 88.7  | 91.3 | 99.7 | 97.9 | 70.1 | 70.1 | 93.7 | 100.0 | 97.6 |
| GS134 | 43.3  |       | 68.3  | 72.6 | 70.7 | 70.4 | 96.0 | 70.9 | 70.2 | 67.5  | 70.4 |
| GS136 | 69.3  | 40.2  |       | 87.9 | 88.4 | 88.0 | 68.0 | 88.6 | 92.1 | 87.3  | 87.9 |
| HQ64  | 77.2  | 48.0  | 69.3  |      | 91.0 | 90.4 | 72.0 | 97.4 | 90.5 | 90.2  | 90.2 |
| HQ19  | 99.2  | 43.3  | 68.5  | 76.4 |      | 97.6 | 69.8 | 90.7 | 93.4 | 99.7  | 97.4 |
| 1     | 92.1  | 41.7  | 66.1  | 73.2 | 91.3 |      | 69.6 | 89.6 | 93.1 | 97.6  | 99.7 |
| 2     | 40.9  | 89.0  | 36.2  | 44.9 | 40.9 | 41.7 |      | 70.4 | 69.3 | 66.6  | 69.6 |
| 3     | 45.1  | 25.4  | 41.3  | 54.5 | 44.6 | 43.2 | 25.4 |      | 90.7 | 90.5  | 89.7 |
| 4     | 80.3  | 40.9  | 77.2  | 74.8 | 79.5 | 79.5 | 41.7 | 46.5 |      | 92.9  | 92.9 |
| 5     | 89.0  | 33.1  | 58.3  | 66.9 | 88.2 | 83.3 | 32.3 | 40.9 | 70.9 |       | 97.6 |
| 6     | 53.7  | 24.1  | 38.4  | 42.6 | 53.2 | 57.9 | 24.5 | 70.8 | 46.8 | 48.6  |      |

**1:** GU056197.1 *Bartonella phoceensis* ; **2:** EF662053.1 Uncultured *Bartonella* sp ;**3:** KT327033.1 *Bartonella grahamii* ; **4:** DQ884379.1 *Bartonella* sp ; **5:** AB529465.1 *Bartonella Koshimizu* ;**6:** AY515126.1 *Bartonella phoceensis*

**Table S3.** Identity comparisons of nucleotide and amino acid sequence of *Bartonella gltA* gene (375bp) in small mammals from this study.`
