# Supplementary material for: Molecular Prevalence, Genetic Diversity, and Tissue Tropism of Bartonella Species in Small Mammals from Yunnan Province, China
Source: Preprints.org preprint supplement (doi:10.20944/preprints202404.0026.v1), 2024-04-01
Supplement: Supplementary file 3 [file supplementary]

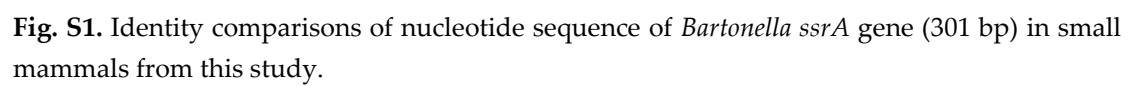

**Fig. S1.** Identity comparisons of nucleotide sequence of *Bartonella ssrA* gene (301 bp) in small mammals from this study.
