# Supplementary material for: Molecular Prevalence, Genetic Diversity, and Tissue Tropism of Bartonella Species in Small Mammals from Yunnan Province, China
Source: Preprints.org preprint supplement (doi:10.20944/preprints202404.0026.v1), 2024-04-01
Supplement: Supplementary file 4 [file supplementary]

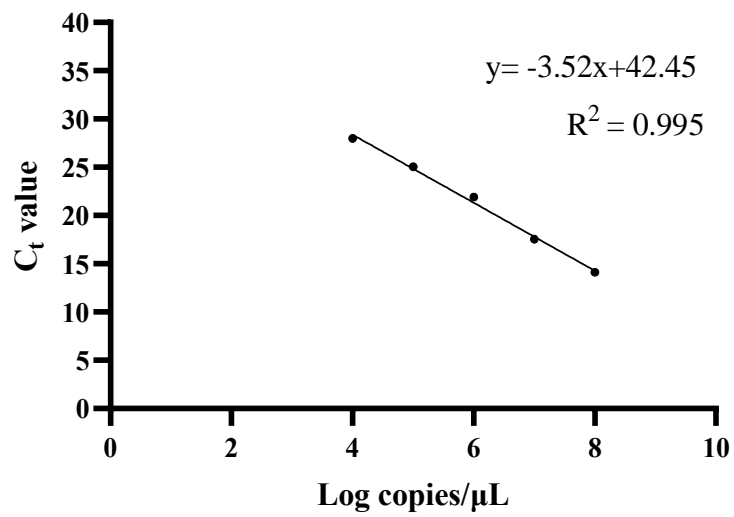

**Fig. S4.** Standard curve. The equation of the standard curve is  $y = -3.477x + 42.23$ , with a correlation coefficient ( $R^2$ ) of 0.995. The slope is -3.477, and the amplification efficiency (E%) is 93.9%.
