# Supplementary material for: Molecular Prevalence, Genetic Diversity, and Tissue Tropism of Bartonella Species in Small Mammals from Yunnan Province, China
Source: Preprints.org preprint supplement (doi:10.20944/preprints202404.0026.v1), 2024-04-01
Supplement: Supplementary file 6 [file supplementary]

**Table 3.** The results of inter-group repeatability

| Number of<br>copies/(copies/ $\mu$ L) | C <sub>t</sub> values |      |      | Mean C <sub>t</sub> | SD  | CV (%) |
|---------------------------------------|-----------------------|------|------|---------------------|-----|--------|
|                                       | 1                     | 2    | 3    |                     |     |        |
| 10 <sup>8</sup>                       | 14.8                  | 14.3 | 14.3 | 14.5                | 0.2 | 1.8    |
| 10 <sup>7</sup>                       | 19.1                  | 18.7 | 18.8 | 18.8                | 0.1 | 1.0    |
| 10 <sup>6</sup>                       | 22.8                  | 22.5 | 22.3 | 22.5                | 0.2 | 1.1    |
| 10 <sup>5</sup>                       | 25.7                  | 25.1 | 26.1 | 25.6                | 0.4 | 0.8    |
| 10 <sup>4</sup>                       | 29.4                  | 28.3 | 28.8 | 28.9                | 0.5 | 1.9    |

C<sub>t</sub>: Cycle Threshold; SD: Standard deviation; CV: Coefficient of variation.
