# Supplementary material for: Molecular Prevalence, Genetic Diversity, and Tissue Tropism of Bartonella Species in Small Mammals from Yunnan Province, China
Source: Preprints.org preprint supplement (doi:10.20944/preprints202404.0026.v1), 2024-04-01
Supplement: Supplementary file 7 [file supplementary]

**Table S4.** The results of intra-group repeatability.

| Number of<br>copies/(copies/ $\mu$ L) | C <sub>t</sub> values |      |      | Mean C <sub>t</sub> | SD   | CV (%) |
|---------------------------------------|-----------------------|------|------|---------------------|------|--------|
|                                       | 1                     | 2    | 3    |                     |      |        |
| 10 <sup>8</sup>                       | 14.2                  | 14.3 | 14.3 | 14.3                | 0.08 | 0.5    |
| 10 <sup>7</sup>                       | 17.6                  | 17.5 | 17.4 | 17.5                | 0.06 | 0.5    |
| 10 <sup>6</sup>                       | 21.6                  | 22.3 | 21.7 | 21.9                | 0.4  | 1.8    |
| 10 <sup>5</sup>                       | 24.8                  | 25.1 | 25.1 | 25.0                | 0.2  | 0.8    |
| 10 <sup>4</sup>                       | 27.6                  | 27.8 | 28.3 | 27.9                | 0.3  | 1.3    |

C<sub>t</sub>: Cycle Threshold; SD: Standard deviation; CV: Coefficient of variation.
