# Supplementary material for: Molecular Prevalence, Genetic Diversity, and Tissue Tropism of Bartonella Species in Small Mammals from Yunnan Province, China
Source: Preprints.org preprint supplement (doi:10.20944/preprints202404.0026.v1), 2024-04-01
Supplement: Supplementary file 8 [file supplementary]

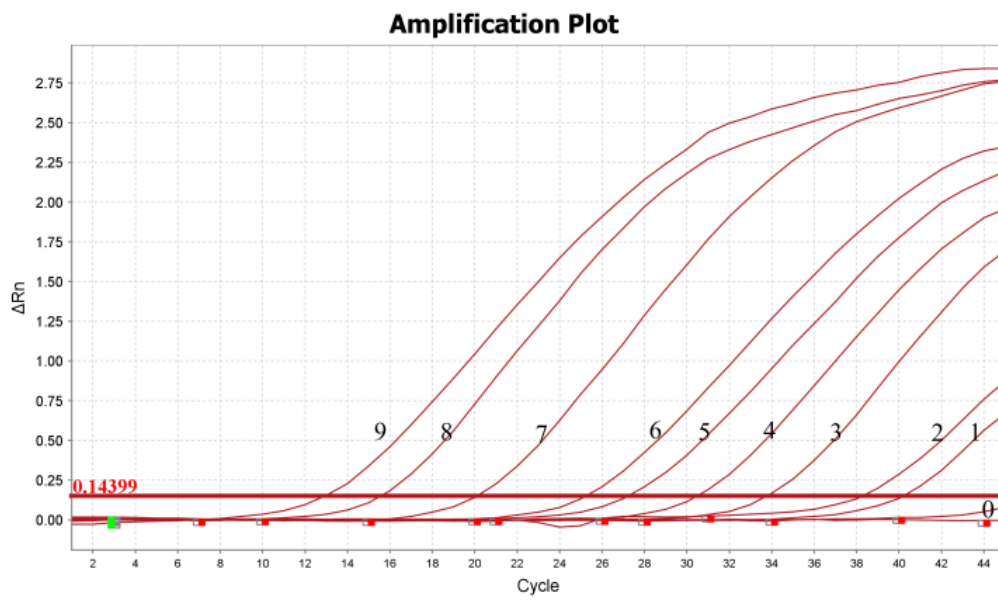

**Fig. S5.** Sensitivity test results. Copies ranged from  $1.0 \times 10^9$  to  $1.0 \times 10^1$  copies/L; 0 indicates the negative control.
