# Supplementary material for: Molecular Prevalence, Genetic Diversity, and Tissue Tropism of Bartonella Species in Small Mammals from Yunnan Province, China
Source: Preprints.org preprint supplement (doi:10.20944/preprints202404.0026.v1), 2024-04-01
Supplement: Supplementary file 9 [file supplementary]

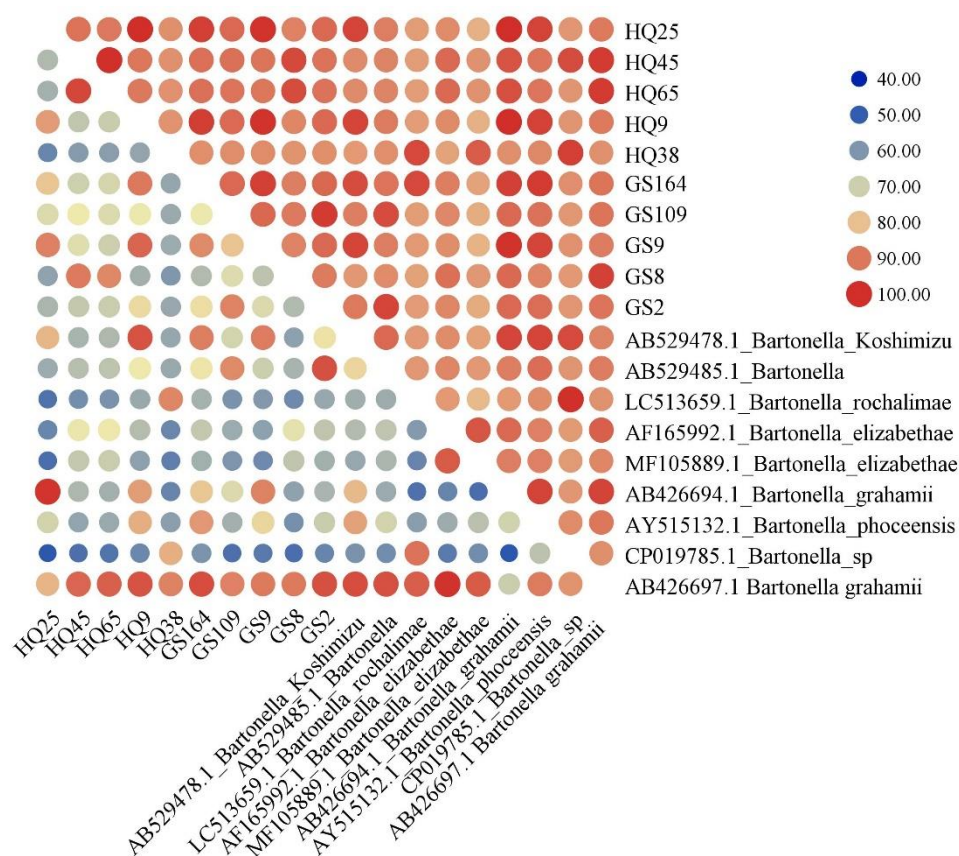

**Fig. S2.** Identity comparisons of nucleotide and amino acid sequence of *Bartonella rpoB* gene

(866bp) in small mammals from this study.

Note: Top right indicates nucleotide sequence identity, while bottom left shows amino acid sequence homology.
