# Supplementary material for: Molecular Prevalence, Genetic Diversity, and Tissue Tropism of Bartonella Species in Small Mammals from Yunnan Province, China
Source: Preprints.org preprint supplement (doi:10.20944/preprints202404.0026.v1), 2024-04-01
Supplement: Supplementary file 11 [file supplementary]

**Table S1 Identity comparisons of nucleotide sequence of *Bartonella* *ssrA* gene (301 bp) from small mammals in this study**

|       | HQ35  | HQ4   | HQ9   | HQ18  | HQ25  | HQ32  | HQ34  | HQ38  | HQ55  | HQ66  | HQ73  | HQ72  | HQ77  | HQ80  | HQ92  | HQ96  | HQ76  | HQ99  | GS183 | GS97  | GS43  | GS60  | GS164 | GS40  | GS39  | GS29  | GS35  | GS37  | GS55  | GS167 | 1    | 2     | 3     | 4     | 5     | 6     | 7     | 8     | 9     | 10 | 11 | 12 |  |  |  |  |  |  |  |  |
|-------|-------|-------|-------|-------|-------|-------|-------|-------|-------|-------|-------|-------|-------|-------|-------|-------|-------|-------|-------|-------|-------|-------|-------|-------|-------|-------|-------|-------|-------|-------|------|-------|-------|-------|-------|-------|-------|-------|-------|----|----|----|--|--|--|--|--|--|--|--|
| HQ35  | 100.0 |       |       |       |       |       |       |       |       |       |       |       |       |       |       |       |       |       |       |       |       |       |       |       |       |       |       |       |       |       |      |       |       |       |       |       |       |       |       |    |    |    |  |  |  |  |  |  |  |  |
| HQ4   | 98.9  | 100.0 |       |       |       |       |       |       |       |       |       |       |       |       |       |       |       |       |       |       |       |       |       |       |       |       |       |       |       |       |      |       |       |       |       |       |       |       |       |    |    |    |  |  |  |  |  |  |  |  |
| HQ9   | 93.1  | 92.1  | 100.0 |       |       |       |       |       |       |       |       |       |       |       |       |       |       |       |       |       |       |       |       |       |       |       |       |       |       |       |      |       |       |       |       |       |       |       |       |    |    |    |  |  |  |  |  |  |  |  |
| HQ18  | 96.2  | 95.2  | 91.5  | 100.0 |       |       |       |       |       |       |       |       |       |       |       |       |       |       |       |       |       |       |       |       |       |       |       |       |       |       |      |       |       |       |       |       |       |       |       |    |    |    |  |  |  |  |  |  |  |  |
| HQ25  | 100.0 | 98.9  | 93.1  | 96.2  | 100.0 |       |       |       |       |       |       |       |       |       |       |       |       |       |       |       |       |       |       |       |       |       |       |       |       |       |      |       |       |       |       |       |       |       |       |    |    |    |  |  |  |  |  |  |  |  |
| HQ32  | 99.5  | 98.4  | 92.6  | 95.7  | 99.5  | 100.0 |       |       |       |       |       |       |       |       |       |       |       |       |       |       |       |       |       |       |       |       |       |       |       |       |      |       |       |       |       |       |       |       |       |    |    |    |  |  |  |  |  |  |  |  |
| HQ34  | 100.0 | 98.9  | 93.1  | 96.2  | 100.0 | 99.5  | 100.0 |       |       |       |       |       |       |       |       |       |       |       |       |       |       |       |       |       |       |       |       |       |       |       |      |       |       |       |       |       |       |       |       |    |    |    |  |  |  |  |  |  |  |  |
| HQ38  | 38.2  | 38.2  | 37.1  | 38.2  | 38.2  | 38.2  | 38.2  | 100.0 |       |       |       |       |       |       |       |       |       |       |       |       |       |       |       |       |       |       |       |       |       |       |      |       |       |       |       |       |       |       |       |    |    |    |  |  |  |  |  |  |  |  |
| HQ55  | 95.2  | 94.1  | 90.5  | 97.9  | 95.2  | 94.6  | 95.2  | 38.2  | 100.0 |       |       |       |       |       |       |       |       |       |       |       |       |       |       |       |       |       |       |       |       |       |      |       |       |       |       |       |       |       |       |    |    |    |  |  |  |  |  |  |  |  |
| HQ66  | 39.8  | 40.3  | 39.7  | 41.4  | 39.8  | 39.8  | 39.8  | 88.3  | 41.4  | 100.0 |       |       |       |       |       |       |       |       |       |       |       |       |       |       |       |       |       |       |       |       |      |       |       |       |       |       |       |       |       |    |    |    |  |  |  |  |  |  |  |  |
| HQ73  | 38.2  | 38.2  | 37.1  | 38.2  | 38.2  | 38.2  | 38.2  | 100.0 | 38.2  | 88.3  | 100.0 |       |       |       |       |       |       |       |       |       |       |       |       |       |       |       |       |       |       |       |      |       |       |       |       |       |       |       |       |    |    |    |  |  |  |  |  |  |  |  |
| HQ72  | 38.2  | 38.2  | 37.1  | 38.2  | 38.2  | 38.2  | 38.2  | 100.0 | 38.2  | 88.3  | 100.0 | 100.0 |       |       |       |       |       |       |       |       |       |       |       |       |       |       |       |       |       |       |      |       |       |       |       |       |       |       |       |    |    |    |  |  |  |  |  |  |  |  |
| HQ77  | 38.2  | 38.2  | 37.1  | 38.2  | 38.2  | 38.2  | 38.2  | 99.5  | 38.2  | 87.8  | 99.5  | 99.5  | 100.0 |       |       |       |       |       |       |       |       |       |       |       |       |       |       |       |       |       |      |       |       |       |       |       |       |       |       |    |    |    |  |  |  |  |  |  |  |  |
| HQ80  | 100.0 | 98.9  | 93.1  | 96.2  | 100.0 | 99.5  | 100.0 | 38.2  | 95.2  | 39.8  | 38.2  | 38.2  | 38.2  | 100.0 |       |       |       |       |       |       |       |       |       |       |       |       |       |       |       |       |      |       |       |       |       |       |       |       |       |    |    |    |  |  |  |  |  |  |  |  |
| HQ92  | 39.8  | 40.3  | 39.7  | 41.4  | 39.8  | 39.8  | 39.8  | 88.8  | 41.4  | 99.5  | 88.8  | 88.8  | 88.3  | 39.8  | 100.0 |       |       |       |       |       |       |       |       |       |       |       |       |       |       |       |      |       |       |       |       |       |       |       |       |    |    |    |  |  |  |  |  |  |  |  |
| HQ96  | 38.2  | 38.2  | 37.1  | 38.2  | 38.2  | 38.2  | 38.2  | 100.0 | 38.2  | 88.3  | 100.0 | 100.0 | 99.5  | 38.2  | 88.8  | 100.0 |       |       |       |       |       |       |       |       |       |       |       |       |       |       |      |       |       |       |       |       |       |       |       |    |    |    |  |  |  |  |  |  |  |  |
| HQ76  | 38.2  | 38.2  | 37.1  | 38.2  | 38.2  | 38.2  | 38.2  | 100.0 | 38.2  | 88.3  | 100.0 | 100.0 | 99.5  | 38.2  | 88.8  | 100.0 | 100.0 |       |       |       |       |       |       |       |       |       |       |       |       |       |      |       |       |       |       |       |       |       |       |    |    |    |  |  |  |  |  |  |  |  |
| HQ99  | 38.2  | 38.2  | 37.1  | 38.2  | 38.2  | 38.2  | 38.2  | 100.0 | 38.2  | 88.3  | 100.0 | 100.0 | 99.5  | 38.2  | 88.8  | 100.0 | 100.0 | 100.0 |       |       |       |       |       |       |       |       |       |       |       |       |      |       |       |       |       |       |       |       |       |    |    |    |  |  |  |  |  |  |  |  |
| GS183 | 90.9  | 89.8  | 88.4  | 88.2  | 90.9  | 90.3  | 90.9  | 37.7  | 87.6  | 39.8  | 37.7  | 37.7  | 37.7  | 90.9  | 39.8  | 37.7  | 37.7  | 37.7  | 100.0 |       |       |       |       |       |       |       |       |       |       |       |      |       |       |       |       |       |       |       |       |    |    |    |  |  |  |  |  |  |  |  |
| GS97  | 86.8  | 85.7  | 83.9  | 86.8  | 86.8  | 86.2  | 86.8  | 35.4  | 85.7  | 39.6  | 35.4  | 35.4  | 35.4  | 86.8  | 39.6  | 35.4  | 35.4  | 35.4  | 84.7  | 100.0 |       |       |       |       |       |       |       |       |       |       |      |       |       |       |       |       |       |       |       |    |    |    |  |  |  |  |  |  |  |  |
| GS43  | 86.8  | 85.7  | 83.9  | 86.8  | 86.8  | 86.2  | 86.8  | 35.4  | 85.7  | 39.6  | 35.4  | 35.4  | 35.4  | 86.8  | 39.6  | 35.4  | 35.4  | 35.4  | 84.7  | 100.0 | 100.0 |       |       |       |       |       |       |       |       |       |      |       |       |       |       |       |       |       |       |    |    |    |  |  |  |  |  |  |  |  |
| GS60  | 92.5  | 91.4  | 87.8  | 93.0  | 92.5  | 91.9  | 92.5  | 37.6  | 92.5  | 39.2  | 37.6  | 37.6  | 37.6  | 92.5  | 39.2  | 37.6  | 37.6  | 37.6  | 88.2  | 83.6  | 83.6  | 100.0 |       |       |       |       |       |       |       |       |      |       |       |       |       |       |       |       |       |    |    |    |  |  |  |  |  |  |  |  |
| GS164 | 95.7  | 94.6  | 94.2  | 94.1  | 95.7  | 95.2  | 95.7  | 38.7  | 93.0  | 39.8  | 38.7  | 38.7  | 38.7  | 95.7  | 39.8  | 38.7  | 38.7  | 38.7  | 89.8  | 85.2  | 85.2  | 90.3  | 100.0 |       |       |       |       |       |       |       |      |       |       |       |       |       |       |       |       |    |    |    |  |  |  |  |  |  |  |  |
| GS40  | 86.8  | 85.7  | 83.9  | 86.8  | 86.8  | 86.2  | 86.8  | 35.4  | 85.7  | 39.6  | 35.4  | 35.4  | 35.4  | 86.8  | 39.6  | 35.4  | 35.4  | 35.4  | 84.7  | 100.0 | 100.0 | 83.6  | 85.2  | 100.0 |       |       |       |       |       |       |      |       |       |       |       |       |       |       |       |    |    |    |  |  |  |  |  |  |  |  |
| GS39  | 86.8  | 85.7  | 83.9  | 86.8  | 86.8  | 86.2  | 86.8  | 35.4  | 85.7  | 39.6  | 35.4  | 35.4  | 35.4  | 86.8  | 39.6  | 35.4  | 35.4  | 35.4  | 84.7  | 100.0 | 100.0 | 83.6  | 85.2  | 100.0 | 100.0 |       |       |       |       |       |      |       |       |       |       |       |       |       |       |    |    |    |  |  |  |  |  |  |  |  |
| GS29  | 97.9  | 96.8  | 92.1  | 98.4  | 97.9  | 97.3  | 97.9  | 39.3  | 97.3  | 40.8  | 39.3  | 39.3  | 39.3  | 97.9  | 40.8  | 39.3  | 39.3  | 39.3  | 89.3  | 86.8  | 86.8  | 94.1  | 94.6  | 86.8  | 86.8  | 100.0 |       |       |       |       |      |       |       |       |       |       |       |       |       |    |    |    |  |  |  |  |  |  |  |  |
| GS35  | 97.9  | 96.8  | 92.1  | 98.4  | 97.9  | 97.3  | 97.9  | 39.3  | 97.3  | 40.8  | 39.3  | 39.3  | 39.3  | 97.9  | 40.8  | 39.3  | 39.3  | 39.3  | 89.3  | 86.8  | 86.8  | 94.1  | 94.6  | 86.8  | 86.8  | 100.0 | 100.0 |       |       |       |      |       |       |       |       |       |       |       |       |    |    |    |  |  |  |  |  |  |  |  |
| GS37  | 97.9  | 96.8  | 92.1  | 98.4  | 97.9  | 97.3  | 97.9  | 39.3  | 97.3  | 40.8  | 39.3  | 39.3  | 39.3  | 97.9  | 40.8  | 39.3  | 39.3  | 39.3  | 89.3  | 86.8  | 86.8  | 94.1  | 94.6  | 86.8  | 86.8  | 100.0 | 100.0 | 100.0 |       |       |      |       |       |       |       |       |       |       |       |    |    |    |  |  |  |  |  |  |  |  |
| GS55  | 91.4  | 90.3  | 87.8  | 88.2  | 91.4  | 90.9  | 91.4  | 37.7  | 87.6  | 39.3  | 37.7  | 37.7  | 37.7  | 91.4  | 39.3  | 37.7  | 37.7  | 37.7  | 95.7  | 83.6  | 83.6  | 88.2  | 89.3  | 83.6  | 83.6  | 89.8  | 89.8  | 89.8  | 100.0 |       |      |       |       |       |       |       |       |       |       |    |    |    |  |  |  |  |  |  |  |  |
| GS167 | 89.3  | 88.2  | 86.8  | 87.1  | 89.3  | 88.7  | 89.3  | 38.2  | 86.6  | 39.8  | 38.2  | 38.2  | 38.2  | 89.3  | 39.8  | 38.2  | 38.2  | 38.2  | 95.2  | 84.1  | 84.1  | 87.6  | 88.2  | 84.1  | 84.1  | 88.7  | 88.7  | 88.7  | 95.2  | 100.0 |      |       |       |       |       |       |       |       |       |    |    |    |  |  |  |  |  |  |  |  |
| 1     | 37.7  | 37.7  | 36.6  | 37.7  | 37.7  | 37.7  | 37.7  | 99.5  | 37.7  | 88.8  | 99.5  | 99.5  | 98.9  | 37.7  | 89.4  | 99.5  | 99.5  | 99.5  | 99.5  | 37.2  | 34.9  | 34.9  | 37.0  | 38.2  | 34.9  | 34.9  | 38.7  | 38.7  | 38.7  | 37.2  | 37.7 | 100.0 |       |       |       |       |       |       |       |    |    |    |  |  |  |  |  |  |  |  |
| 2     | 86.8  | 85.7  | 83.9  | 86.2  | 86.8  | 86.2  | 86.8  | 33.9  | 85.2  | 38.0  | 33.9  | 33.9  | 33.9  | 86.8  | 38.0  | 33.9  | 33.9  | 33.9  | 85.2  | 96.8  | 96.8  | 83.6  | 85.2  | 96.8  | 96.8  | 86.2  | 86.2  | 86.2  | 85.2  | 84.7  | 33.3 | 100.0 |       |       |       |       |       |       |       |    |    |    |  |  |  |  |  |  |  |  |
| 3     | 86.2  | 85.2  | 83.3  | 85.7  | 86.2  | 85.7  | 86.2  | 34.4  | 84.7  | 38.5  | 34.4  | 34.4  | 34.4  | 86.2  | 38.5  | 34.4  | 34.4  | 34.4  | 85.2  | 95.8  | 95.8  | 83.1  | 84.7  | 95.8  | 95.8  | 85.7  | 85.7  | 85.7  | 85.7  | 84.7  | 33.9 | 98.9  | 100.0 |       |       |       |       |       |       |    |    |    |  |  |  |  |  |  |  |  |
| 4     | 38.7  | 38.7  | 37.6  | 38.7  | 38.7  | 38.7  | 38.7  | 94.7  | 38.7  | 87.2  | 94.7  | 94.7  | 94.2  | 38.7  | 87.8  | 94.7  | 94.7  | 94.7  | 37.7  | 35.4  | 35.4  | 37.6  | 38.2  | 35.4  | 35.4  | 39.8  | 39.8  | 39.8  | 37.7  | 38.2  | 95.2 | 33.9  | 34.4  | 100.0 |       |       |       |       |       |    |    |    |  |  |  |  |  |  |  |  |
| 5     | 85.6  | 84.6  | 84.8  | 84.0  | 85.6  | 85.1  | 85.6  | 31.9  | 83.0  | 35.6  | 31.9  | 31.9  | 31.9  | 85.6  | 35.6  | 31.9  | 31.9  | 31.9  | 85.1  | 88.4  | 88.4  | 82.5  | 85.1  | 88.4  | 88.4  | 85.1  | 85.1  | 85.1  | 85.6  | 87.2  | 31.4 | 88.9  | 88.4  | 31.9  | 100.0 |       |       |       |       |    |    |    |  |  |  |  |  |  |  |  |
| 6     | 86.2  | 85.2  | 83.3  | 86.2  | 86.2  | 85.7  | 86.2  | 34.9  | 85.2  | 39.1  | 34.9  | 34.9  | 34.9  | 86.2  | 39.1  | 34.9  | 34.9  | 34.9  | 84.1  | 99.5  | 99.5  | 83.1  | 84.7  | 99.5  | 99.5  | 86.2  | 86.2  | 86.2  | 84.1  | 84.7  | 34.4 | 97.4  | 96.3  | 34.9  | 88.9  | 100.0 |       |       |       |    |    |    |  |  |  |  |  |  |  |  |
| 7     | 37.2  | 37.2  | 36.1  | 37.2  | 37.2  | 37.2  | 37.2  | 98.4  | 37.2  | 87.8  | 98.4  | 98.4  | 97.9  | 37.2  | 88.3  | 98.4  | 98.4  | 98.4  | 36.7  | 34.4  | 34.4  | 36.5  | 37.7  | 34.4  | 34.4  | 38.2  | 38.2  | 38.2  | 37.7  | 37.2  | 98.9 | 32.8  | 33.3  | 94.2  | 30.9  | 33.9  | 100.0 |       |       |    |    |    |  |  |  |  |  |  |  |  |
| 8     | 86.7  | 85.6  | 83.8  | 86.2  | 86.7  | 86.2  | 86.7  | 34.6  | 85.1  | 38.7  | 34.6  | 34.6  | 34.6  | 86.7  | 38.7  | 34.6  | 34.6  | 34.6  | 85.1  | 94.7  | 94.7  | 83.0  | 85.1  | 94.7  | 94.7  | 86.2  | 86.2  | 86.2  | 85.1  | 84.6  | 34.0 | 97.9  | 96.8  | 34.6  | 88.8  | 95.2  | 33.5  | 100.0 |       |    |    |    |  |  |  |  |  |  |  |  |
| 9     | 96.2  | 95.2  | 93.7  | 95.7  | 96.2  | 95.7  | 96.2  | 37.2  | 94.6  | 39.8  | 37.2  | 37.2  | 37.2  | 96.2  | 39.8  | 37.2  | 37.2  | 37.2  | 90.3  | 86.8  | 86.8  | 92.5  | 96.2  | 86.8  | 86.8  | 96.2  | 96.2  | 96.2  | 89.3  | 88.2  | 36.7 | 86.8  | 86.2  | 37.7  | 84.6  | 86.2  | 36.1  | 86.7  | 100.0 |    |    |    |  |  |  |  |  |  |  |  |
| 10    |       |       |       |       |       |       |       |       |       |       |       |       |       |       |       |       |       |       |       |       |       |       |       |       |       |       |       |       |       |       |      |       |       |       |       |       |       |       |       |    |    |    |  |  |  |  |  |  |  |  |
