# Supplementary figures and images for: Molecular Prevalence, Genetic Diversity, and Tissue Tropism of Bartonella Species in Small Mammals from Yunnan Province, China
Source: Preprints.org preprint supplement (doi:10.20944/preprints202404.0026.v1), 2024-04-01

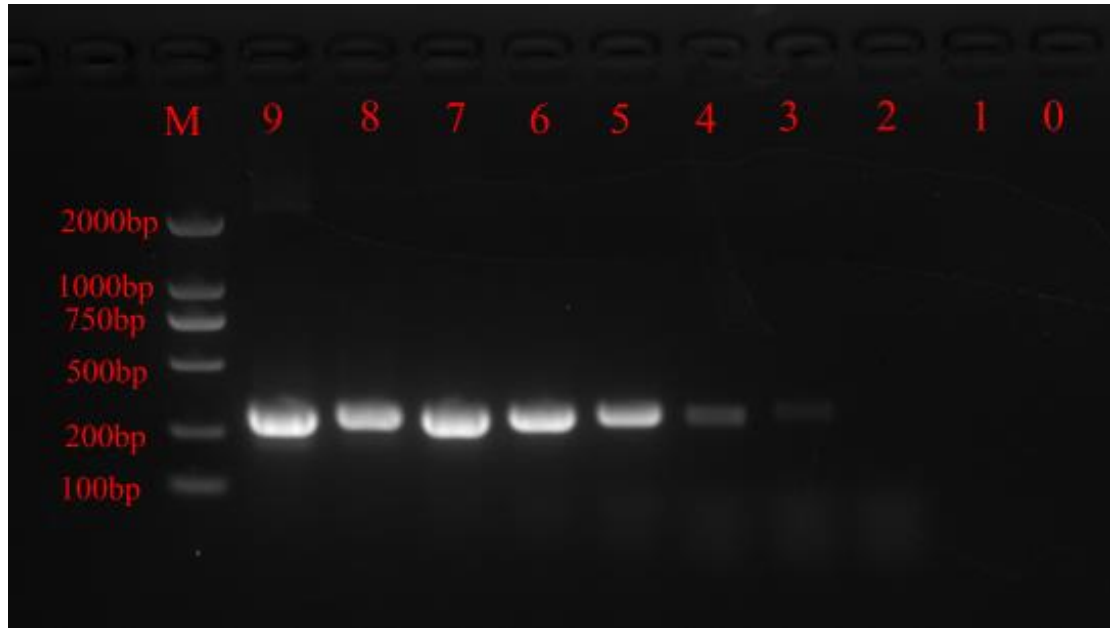

**Fig. S6.** Conventional PCR results. M: Trans2K DNA Marker; 9-1: $1.0 \times 10^9$ - $1.0 \times 10^1$ ; 0: negative control.

Supplement: Supplementary file 5 [file supplementary]
